# Supplementary material
Source: publisher site journal article supplement (https://www.dovepress.com/article/393495)
Supplement: Supplementary file 1 [file get_supplementary_file.php]

**Supplementary Tables**

**Supplementary Table** **1.** Average molecular weight and molecular weight distribution range for HA and B-HA standards

| **Standards** | **Manufacturer** | **MW range** | **Average MW (SDS-PAGE)** | **MW range (SDS-PAGE) (>90%)** | **Average MW (MALLS-GPC)** | **MW range (MALLS-GPC) (>90%)** |
| --- | --- | --- | --- | --- | --- | --- |
|  |
| HA 24 kDa | Physical and chemical combination of biological enzymes |  | 24 kDa | 10-40 kDa | 24 kDa | 10-40 kDa |  |
| (FuRuida) |  |
| B-HA 35 kDa | Recombinant human PH20 |  | 35 kDa | 10-70 kDa | 35 kDa | 10-70 kDa |  |
|  |
| (HHTECHNOLOGY) |  |
| HA 60 kDa | Physical and chemical methods |  | 60 kDa | 40-90 kDa | 60 kDa | 20-100 kDa |  |
| (Liyangshengwu) |  |
| HA 300 kDa | Streptococcus equi | 300 kDa |  |  | 300 kDa | 200-400 kDa |  |
| (FuRuida) | (200-400 kDa) |  |
| HA 1600 kD | Streptococcus equi | 1600 kDa |  |  | 1600 kDa | 1200-1800 kDa |  |
| (FuRuida) | (1200-1800 kDa) |  |  |

**Supplementary Table** **2** Minimum percent concentrations of HA and B-HA, with different molecular weights, that induced erythrocyte aggregation (rouleaux formation) in sheep

|  | Final conc. | HA 24 kDa | B-HA 35 kDa | HA 60 kDa | HA 300 kDa | HA 1600 kDa |
| --- | --- | --- | --- | --- | --- | --- |
|  |
| MW (kDa) |  | 24 | 35 | 60 | 300 | 1600 |  |
| MW range (kDa) |  | 10-40 | 10-70 | 40-90 | 200-400 | 1200-1800 |  |
| Erythrocyte aggregation | 0.60% | No. |  |  |  |  |  |
| 0.30% | No. | No. | No. | No. | Yes |  |
| 0.15% | No. | No. | No. | No. | Yes |  |
| 0.08% | No. | No. | No. | No. | Yes |  |
| 0.04% | No. | No. | No. | No. | No. |  |
| 0.02% | No. | No. | No. | No. | No. |  |

**Supplementary Table** **3** Minimum percent concentrations of HA and B-HA, with different molecular weights, that induced erythrocyte aggregation (rouleaux formation) in cattle

|  | Final conc. | HA 24 kDa | B-HA 35 kDa | HA 60 kDa | HA 300 kDa | HA 1600 kDa |
| --- | --- | --- | --- | --- | --- | --- |
|  |
| MW (kDa) |  | 24 | 35 | 60 | 300 | 1600 |  |
| MW range (kDa) |  | 10-40 | 10-70 | 40-90 | 200-400 | 1200-1800 |  |
| Erythrocyte aggregation | 0.60% | No. |  |  |  |  |  |
| 0.30% | No. | No. | No. | Yes | Yes |  |
| 0.15% | N | No. | No. | Yes | Yes |  |
| 0.08% | No. | No. | No. | No. | Yes |  |
| 0.04% | No. | No. | No. | No. | No. |  |
| 0.02% | No. | No. | No. | No. | No. |  |

**Supplementary Table** **4.** Minimum percent concentrations of HA and B-HA, with different molecular weights, that induced mouse erythrocyte aggregation (rouleaux formation)

|  | Final conc. | HA 24 kDa | B-HA 35 kDa | HA 60 kDa | HA 300 kDa | HA 1600 kDa |
| --- | --- | --- | --- | --- | --- | --- |
|  |
| Avg. MW(kDa) |  | 24 | 35 | 60 | 300 | 1600 |  |
| MW range (kDa) |  | 10-40 | 10-70 | 40-90 | 200-400 | 1200-1800 |  |
| Erythrocyte aggregation | 0.60% | **Yes** |  |  |  |  |  |
| 0.30% | No | Yes | Yes |  | Yes* |  |
| 0.15% | No | **Yes** | Yes | Yes | **Yes*** |  |
| 0.08% | No | No | **Yes** | **Yes** | No |  |
| 0.04% | No | No | No | No | No |  |
| 0.02% | No | No | No | No | No |  |

The bold characters are the minimum concentrations of HA that induced mouse erythrocyte aggregation (rouleaux formation), and * indicates severe cell deformation.

**Supplementary Table** **5.** Minimum percent concentrations of HA and B-HA, with different molecular weights, that induced erythrocyte aggregation (rouleaux formation) in beagle dogs

|  | Final conc. | HA 24 kDa | B-HA 35 kDa | HA 60 kDa | HA 300 kDa | HA 1600 kDa |
| --- | --- | --- | --- | --- | --- | --- |
|  |
| Avg. MW(kDa) |  | 24 | 35 | 60 | 300 | 1600 |  |
| MW range (kDa) |  | 10-40 | 10-70 | 40-90 | 200-400 | 1200-1800 |  |
| Erythrocyte aggregation | 0.60% | Yes# |  |  |  |  |  |
| 0.30% | **Yes** | Yes | Yes# | Yes* | Yes# |  |
| 0.15% | No | **Yes** | Yes | **Yes*** | Yes |  |
| 0.08% | No | No | **Yes** | No | Yes |  |
| 0.04% | No | No | No | No | Yes |  |
| 0.02% | No | No | No | No | **Yes** |  |

The bold characters are the minimum concentrations of HA that induced erythrocyte aggregation (rouleaux formation) in beagle dogs; * indicates severe cell deformation; # indicates massive erythrocyte aggregation (rouleaux formation).

**Supplementary Table** **6.** Effect of different final concentrations of B-HA on human erythrocyte sedimentation rate (cm/25 min)

| Batch (*n*=4) | | 1st | 2nd | 3rd | 4th | *Mean ± SD* | *CV* |
| --- | --- | --- | --- | --- | --- | --- | --- |
| MW (kDa) | | 44.9 | 25.4 | 37.2 | 37.7 | 36.3±7 | 19.30% |
| Erythrocyte sedimentation rate (cm/25 min) | 0.15% B-HA | 4.5 | 4.4 | 3.9 | 1.8 | 3.7±1.1 | 29.90% |
| 0.11% B-HA | 3.4 | 3.6 | 1.9 | 1.1 | 2.5±1.0 | 41.70% |
| 0.075% B-HA | 0.9 | 0.9 | 0.8 | 0.2 | 0.8±0.4 | 51.70% |

**Supplementary Table** **7.** Effect of different final concentrations of B-HA on the erythrocyte sedimentation rate in beagle dogs (cm/25 min)

| Batch (*n*=4) | | 1st | 2nd | 3rd | 4th | *Mean ± SD* | *CV* |
| --- | --- | --- | --- | --- | --- | --- | --- |
| MW (kDa) | | 44.9 | 25.4 | 37.2 | 37.7 | 36.3±7 | 19.30% |
| Erythrocyte sedimentation rate (cm/25 min) | 0.15% B-HA | 4.5 | 4.5 | 4.1 | 2.6 | 3.9±1.1 | 19.90% |
| 0.11% B-HA | 4.4 | 4.1 | 3.3 | 1.2 | 3.2±1.0 | 38.50% |
| 0.075% B-HA | 1.5 | 2.2 | 1.1 | 0.5 | 1.3±0.4 | 46.60% |

**Supplementary Table** **8.** Effect of different final concentrations of B-HA on the mouse erythrocyte sedimentation rate (cm/25 min)

| Batch (*n*=4) | | 1st | 2nd | 3rd | 4th | *Mean ± SD* | *CV* |
| --- | --- | --- | --- | --- | --- | --- | --- |
| MW (kDa) | | 44.9 | 25.4 | 37.2 | 37.7 | 36.3±7 | 19.30% |
| Erythrocyte sedimentation rate (cm/25 min) | 0.15% B-HA | 2 | 2 | 1.8 | 0.2 | 1.5±1.1 | 50.30% |
| 0.11% B-HA | 0.7 | 1 | 0.5 | 0.1 | 0.6±1.0 | 56.90% |
| 0.075% B-HA | 0.2 | 0.3 | 0.1 | 0.05 | 0.2±0.4 | 59.10% |

**Supplementary Table** **9.** Study on the safety of the intravenous injection of B-HA in beagle dogs

|  | Samples (Forelimb intravenous injection) |
| --- | --- |
| Quiet during and after injection | 30 |
| Pain-related avoidance and howling during injection | 0 |
| Fatigue, shaking, convulsions, falling to the ground, death after injection | 0 |
